# Supplementary material for: Transcriptome and Phytochemical Analyses Provide New Insights Into Long Non-Coding RNAs Modulating Characteristic Secondary Metabolites of Oolong Tea (Camellia sinensis) in Solar-Withering
Source: Front Plant Sci. 2019 Dec 27;10:1638. doi: 10.3389/fpls.2019.01638 (PMC6941427; doi:10.3389/fpls.2019.01638)
Supplement: Supplementary file 12 [file Table_3.xls]

## Sheet: Sheet1
Supplementary Table S3. DEGs related to flavonoid metabolic pathway and lignin metabolic pathway in FL, IW, and SW.
Gene ID	KO ID	EC Number	Annotation
MTCONS_00092662	K10775	4.3.1.24	phenylalanine ammonia-lyase (PAL)
CSA023534.1	K10775	4.3.1.24	phenylalanine ammonia-lyase (PAL)
CSA022024.1	K10775	4.3.1.24	phenylalanine ammonia-lyase (PAL)
CSA032883.1	K10775	4.3.1.24	phenylalanine ammonia-lyase (PAL)
CSA016076.1	K10775	4.3.1.24	phenylalanine ammonia-lyase (PAL)
CSA028450.1	K10775	4.3.1.24	phenylalanine ammonia-lyase (PAL)
CSA032295.1	K00487	1.14.13.11	cinnamate 4-hydroxylase (C4H)
CSA001158.1	K00487	1.14.13.11	cinnamate 4-hydroxylase (C4H)
MTCONS_00081440	K00487	1.14.13.11	cinnamate 4-hydroxylase (C4H)
MTCONS_00081438	K00487	1.14.13.11	cinnamate 4-hydroxylase (C4H)
CSA022101.1	K00487	1.14.13.11	cinnamate 4-hydroxylase (C4H)
MTCONS_00025256	K01904	6.2.1.12	4-coumarate CoA ligase (4CL)
CSA016711.1	K01904	6.2.1.12	4-coumarate CoA ligase (4CL)
CSA015903.1	K01904	6.2.1.12	4-coumarate CoA ligase (4CL)
MTCONS_00094929	K00660	2.3.1.74	chalcone synthase (CHS)
CSA029773.1	K00660	2.3.1.74	chalcone synthase (CHS)
CSA029707.1	K00660	2.3.1.74	chalcone synthase (CHS)
CSA024718.1	K00660	2.3.1.74	chalcone synthase (CHS)
CSA029775.1	K00660	2.3.1.74	chalcone synthase (CHS)
MTCONS_00000269	K00660	2.3.1.74	chalcone synthase (CHS)
MTCONS_00060938	K01859	5.5.1.6	chalcone isomerase (CHI)
MTCONS_00008533	K01859	5.5.1.6	chalcone isomerase (CHI)
MTCONS_00030933	K01859	5.5.1.6	chalcone isomerase (CHI)
CSA013922.1	K01859	5.5.1.6	chalcone isomerase (CHI)
MTCONS_00000123	K01859	5.5.1.6	chalcone isomerase (CHI)
CSA008201.1	K00475	1.14.11.9	flavonoid 3-hydroxylase (F3H)
CSA011009.1	K00475	1.14.11.9	flavonoid 3-hydroxylase (F3H)
CSA004930.1	K00475	1.14.11.9	flavonoid 3-hydroxylase (F3H)
CSA013326.1	K00475	1.14.11.9	flavonoid 3-hydroxylase (F3H)
MTCONS_00068195	K00475	1.14.11.9	flavonoid 3-hydroxylase (F3H)
CSA023049.1	K05280	1.14.13.21	flavonoid 3′-hydroxylase (F3'H)
MTCONS_00092514	K05280	1.14.13.21	flavonoid 3′-hydroxylase (F3'H)
MTCONS_00044513	K05280	1.14.13.21	flavonoid 3′-hydroxylase (F3'H)
CSA027578.1	K05278	1.14.11.23	flavonol synthase (FLS)
CSA035082.1	K05278	1.14.11.23	flavonol synthase (FLS)
MTCONS_00031810	K05278	1.14.11.23	flavonol synthase (FLS)
MTCONS_00024759	K05278	1.14.11.23	flavonol synthase (FLS)
MTCONS_00101854	K05278	1.14.11.23	flavonol synthase (FLS)
CSA001007.1	K05278	1.14.11.23	flavonol synthase (FLS)
CSA002931.1	K05278	1.14.11.23	flavonol synthase (FLS)
CSA026568.1	K05278	1.14.11.23	flavonol synthase (FLS)
CSA022659.1	K05278	1.14.11.23	flavonol synthase (FLS)
CSA003707.1	K05278	1.14.11.23	flavonol synthase (FLS)
MTCONS_00091218	K05278	1.14.11.23	flavonol synthase (FLS)
CSA006950.1	K05278	1.14.11.23	flavonol synthase (FLS)
CSA008358.1	K05278	1.14.11.23	flavonol synthase (FLS)
CSA020720.1	K05278	1.14.11.23	flavonol synthase (FLS)
MTCONS_00037391	K05278	1.14.11.23	flavonol synthase (FLS)
MTCONS_00071366	K05278	1.14.11.23	flavonol synthase (FLS)
CSA012133.1	K05278	1.14.11.23	flavonol synthase (FLS)
CSA003949.1	K13082	1.1.1.219	dihydroflavonol 4-reductase (DFR)
MTCONS_00044470	K13082	1.1.1.219	dihydroflavonol 4-reductase (DFR)
MTCONS_00094682	K13082	1.1.1.219	dihydroflavonol 4-reductase (DFR)
MTCONS_00035874	K13082	1.1.1.219	dihydroflavonol 4-reductase (DFR)
MTCONS_00094683	K13082	1.1.1.219	dihydroflavonol 4-reductase (DFR)
MTCONS_00092979	K13082	1.1.1.219	dihydroflavonol 4-reductase (DFR)
CSA002127.1	K13082	1.1.1.219	dihydroflavonol 4-reductase (DFR)
CSA011508.1	K05277	1.14.11.19	anthocyanidin synthase (ANS)
MTCONS_00062357	K05277	1.14.11.19	anthocyanidin synthase (ANS)
MTCONS_00006348	K05277	1.14.11.19	anthocyanidin synthase (ANS)
CSA000829.1	K05277	1.14.11.19	anthocyanidin synthase (ANS)
MTCONS_00062358	K05277	1.14.11.19	anthocyanidin synthase (ANS)
MTCONS_00086693	K08695	1.3.1.77	anthocyanidin reductase (ANR)
MTCONS_00024351	K09753	1.2.1.44	cinnamoyl-CoA reductase (CCR)
CSA016481.1	K09753	1.2.1.44	cinnamoyl-CoA reductase (CCR)
MTCONS_00020170	K09753	1.2.1.44	cinnamoyl-CoA reductase (CCR)
MTCONS_00005860	K09753	1.2.1.44	cinnamoyl-CoA reductase (CCR)
CSA008619.1	K09753	1.2.1.44	cinnamoyl-CoA reductase (CCR)
CSA004850.1	K09753	1.2.1.44	cinnamoyl-CoA reductase (CCR)
CSA020799.1	K09753	1.2.1.44	cinnamoyl-CoA reductase (CCR)
CSA006900.1	K09753	1.2.1.44	cinnamoyl-CoA reductase (CCR)
MTCONS_00090853	K09753	1.2.1.44	cinnamoyl-CoA reductase (CCR)
CSA000931.1	K09753	1.2.1.44	cinnamoyl-CoA reductase (CCR)
CSA029544.1	K09753	1.2.1.44	cinnamoyl-CoA reductase (CCR)
MTCONS_00007750	K09753	1.2.1.44	cinnamoyl-CoA reductase (CCR)
CSA010774.1	K09753	1.2.1.44	cinnamoyl-CoA reductase (CCR)
MTCONS_00066601	K00083	1.1.1.195	cinnamyl alcohol dehydrogenase (CAD)
MTCONS_00091927	K00083	1.1.1.195	cinnamyl alcohol dehydrogenase (CAD)
MTCONS_00048376	K00083	1.1.1.195	cinnamyl alcohol dehydrogenase (CAD)
CSA036047.1	K00083	1.1.1.195	cinnamyl alcohol dehydrogenase (CAD)
MTCONS_00033147	K00083	1.1.1.195	cinnamyl alcohol dehydrogenase (CAD)
MTCONS_00092645	K00083	1.1.1.195	cinnamyl alcohol dehydrogenase (CAD)
CSA014391.1	K00083	1.1.1.195	cinnamyl alcohol dehydrogenase (CAD)
CSA026155.1	K00083	1.1.1.195	cinnamyl alcohol dehydrogenase (CAD)
CSA026158.1	K00083	1.1.1.195	cinnamyl alcohol dehydrogenase (CAD)
CSA032745.1	K00083	1.1.1.195	cinnamyl alcohol dehydrogenase (CAD)
CSA008963.1	K00083	1.1.1.195	cinnamyl alcohol dehydrogenase (CAD)
CSA008965.1	K00083	1.1.1.195	cinnamyl alcohol dehydrogenase (CAD)
MTCONS_00064997	K00083	1.1.1.195	cinnamyl alcohol dehydrogenase (CAD)
CSA002499.1	K00083	1.1.1.195	cinnamyl alcohol dehydrogenase (CAD)
MTCONS_00054532	K00083	1.1.1.195	cinnamyl alcohol dehydrogenase (CAD)
CSA020376.1	K00083	1.1.1.195	cinnamyl alcohol dehydrogenase (CAD)
MTCONS_00062734	K00083	1.1.1.195	cinnamyl alcohol dehydrogenase (CAD)
CSA008405.1	K00083	1.1.1.195	cinnamyl alcohol dehydrogenase (CAD)
MTCONS_00033221	K00083	1.1.1.195	cinnamyl alcohol dehydrogenase (CAD)
CSA005610.1	K00083	1.1.1.195	cinnamyl alcohol dehydrogenase (CAD)
MTCONS_00088190	K00083	1.1.1.195	cinnamyl alcohol dehydrogenase (CAD)
CSA008028.1	K00083	1.1.1.195	cinnamyl alcohol dehydrogenase (CAD)
CSA005213.1	K00083	1.1.1.195	cinnamyl alcohol dehydrogenase (CAD)
CSA019604.1	K00083	1.1.1.195	cinnamyl alcohol dehydrogenase (CAD)
CSA008960.1	K00083	1.1.1.195	cinnamyl alcohol dehydrogenase (CAD)
MTCONS_00098912	K00083	1.1.1.195	cinnamyl alcohol dehydrogenase (CAD)
MTCONS_00009653	K00083	1.1.1.195	cinnamyl alcohol dehydrogenase (CAD)
MTCONS_00087490	K00083	1.1.1.195	cinnamyl alcohol dehydrogenase (CAD)
CSA009568.1	K00083	1.1.1.195	cinnamyl alcohol dehydrogenase (CAD)
MTCONS_00099975	K00083	1.1.1.195	cinnamyl alcohol dehydrogenase (CAD)
CSA008029.1	K00083	1.1.1.195	cinnamyl alcohol dehydrogenase (CAD)
CSA035738.1	K00083	1.1.1.195	cinnamyl alcohol dehydrogenase (CAD)
MTCONS_00062735	K00083	1.1.1.195	cinnamyl alcohol dehydrogenase (CAD)
MTCONS_00033222	K00083	1.1.1.195	cinnamyl alcohol dehydrogenase (CAD)
MTCONS_00099976	K00083	1.1.1.195	cinnamyl alcohol dehydrogenase (CAD)
CSA005609.1	K13065	2.3.1.133	hydroxycinnamoyltransferase (HCT)
CSA021003.1	K13065	2.3.1.133	hydroxycinnamoyltransferase (HCT)
MTCONS_00030126	K13065	2.3.1.133	hydroxycinnamoyltransferase (HCT)
MTCONS_00038976	K13065	2.3.1.133	hydroxycinnamoyltransferase (HCT)
MTCONS_00051576	K13065	2.3.1.133	hydroxycinnamoyltransferase (HCT)
MTCONS_00062378	K13065	2.3.1.133	hydroxycinnamoyltransferase (HCT)
MTCONS_00070351	K13065	2.3.1.133	hydroxycinnamoyltransferase (HCT)
MTCONS_00002944	K13065	2.3.1.133	hydroxycinnamoyltransferase (HCT)
MTCONS_00078355	K13065	2.3.1.133	hydroxycinnamoyltransferase (HCT)
MTCONS_00085722	K13065	2.3.1.133	hydroxycinnamoyltransferase (HCT)
CSA027815.1	K13065	2.3.1.133	hydroxycinnamoyltransferase (HCT)
MTCONS_00032215	K13065	2.3.1.133	hydroxycinnamoyltransferase (HCT)
CSA008809.1	K13065	2.3.1.133	hydroxycinnamoyltransferase (HCT)
